# Supplementary material
Source: PubMed Central journal article supplement (PMC3597757)
Supplement: NIHMS425348-supplement-01.pdf [file NIHMS425348-supplement-01.pdf]

Supplementary Table 1. Linkage disequilibrium among SNPs in the same gene or region

| Chromosome | gene          | SNP ID    | Linkage disequilibrium D' (r <sup>2</sup> ) |             |             |             |
|------------|---------------|-----------|---------------------------------------------|-------------|-------------|-------------|
| 1 p36      | <i>MTHFR</i>  | rs1801131 | }                                           | 1.00 (0.86) |             |             |
|            |               | rs1801133 |                                             |             |             |             |
| 1 q42      | <i>mEH</i>    | rs2234922 | }                                           | 0.48 (0.02) |             |             |
|            |               | rs1051740 |                                             |             |             |             |
| 2 p22      | <i>CYP1B1</i> | rs1056836 | }                                           | 1.00 (0.90) |             |             |
|            |               | rs1800440 |                                             |             |             |             |
| 3 p25      | <i>XPC</i>    | rs2228001 | }                                           | 1.00 (0.30) |             |             |
|            |               | rs2228000 |                                             |             |             |             |
| 8 p22      | <i>NAT2</i>   | rs1801280 | }                                           | 1.00 (0.85) |             |             |
|            |               | rs1799931 |                                             |             |             |             |
|            |               | rs1799930 |                                             |             | }           | 1.00 (0.71) |
| 11 q13     | <i>GSTP1</i>  | rs1695    | }                                           | 0.92 (0.28) |             |             |
|            |               | rs1138272 |                                             |             |             |             |
| 15 q24     | <i>CYP1A1</i> | rs1048943 | }                                           | 1.00 (0.94) |             |             |
|            |               | rs1799814 |                                             |             |             |             |
|            | <i>CYP1A2</i> | rs762551  | 1.00 (0.82)                                 | }           | 0.49 (0.06) |             |
| 16 q22     | <i>NQO1</i>   | rs1800566 | }                                           |             |             | 1.00 (0.62) |
|            |               | rs1131341 |                                             |             |             |             |
| 19 q13     | <i>ERCC1</i>  | rs11615   | }                                           | 1.00 (0.88) |             |             |
|            |               | rs3212948 |                                             |             |             |             |
|            |               | rs3212986 |                                             |             | }           | 1.00 (0.85) |

Supplementary Table 2. Regression coefficients for the effects of haplotypes on adducts and NER

| Gene             | Haplotype alleles | Frequency (%) | adduct model |         | NER model   |             |
|------------------|-------------------|---------------|--------------|---------|-------------|-------------|
|                  |                   |               | Coefficient  | P value | Coefficient | P value     |
| <b>MTHFR</b>     | CC                | 43            | reference    |         | reference   |             |
|                  | CA                | 39            | 0.06         | 0.4     | <b>0.41</b> | <b>0.02</b> |
|                  | TA                | 18            | 0.08         | 0.4     | 0.06        | 0.8         |
| <b>CYP1B1</b>    | GA                | 53            | reference    |         | -           | -           |
|                  | GG                | 20            | -0.09        | 0.3     | -           | -           |
|                  | CA                | 27            | -0.01        | 0.9     | -           | -           |
| <b>XPC</b>       | CA                | 50            | reference    |         | reference   |             |
|                  | CC                | 27            | -0.05        | 0.6     | -0.03       | 0.9         |
|                  | TC                | 23            | -0.03        | 0.7     | -0.01       | 0.9         |
| <b>NAT2</b>      | GCG               | 32            | reference    |         | -           | -           |
|                  | ATG               | 30            | 0.03         | 0.7     | -           | -           |
|                  | GTG               | 28            | 0.07         | 0.4     | -           | -           |
|                  | GTA               | 10            | 0.05         | 0.7     | -           | -           |
| <b>GSTP1</b>     | AT                | 75            | reference    |         | -           | -           |
|                  | GT                | 15            | -0.07        | 0.4     | -           | -           |
|                  | GC                | 8.5           | 0.04         | 0.8     | -           | -           |
| <b>CYP1A1/A2</b> | ACA               | 46            | reference    |         | -           | -           |
|                  | ACC               | 41            | -0.03        | 0.6     | -           | -           |
|                  | GCA               | 7             | -0.03        | 0.8     | -           | -           |
|                  | AAA               | 5             | -0.04        | 0.8     | -           | -           |
| <b>NQO1</b>      | CC                | 69            | reference    |         | -           | -           |
|                  | CT                | 27            | -0.08        | 0.3     | -           | -           |
|                  | TC                | 4             | -0.04        | 0.8     | -           | -           |
| <b>ERCC1</b>     | CGT               | 45            | reference    |         | reference   |             |
|                  | TCG               | 29            | 0.02         | 0.8     | 0.18        | 0.4         |
|                  | TCT               | 23            | 0.01         | 0.9     | -0.07       | 0.7         |
|                  | TGT               | 3             | 0.03         | 0.8     | -0.26       | 0.5         |

NER: Nucleotide excision repair. Only SNP's with a putative effect on DNA repair were modeled against NER capacity.
